# Supplementary material
Source: MDPI journal article supplement (https://www.mdpi.com/2076-3298/5/7/76)
Supplement: s1 [file s1]

## AQUACULTURE HOUSEHOLD SURVEY QUESTIONNAIRE

**ENUMERATOR:** It is necessary to introduce the household to the survey and obtain the consent of all prospective respondents to participate. If a prospective respondent (e.g. a woman of reproductive age) is not present at the beginning of the interview, be sure to return to this page and obtain consent before interviewing him or her. Ask to speak with a responsible adult in the household.

***Read to respondent:***

Thank you for the opportunity to speak with you. We are a research team from Royal University of Agriculture. We are conducting a survey to learn about food security and aquaculture among households in this area. Your household has been selected to participate in an interview that includes questions fish farming and about the household generally. This interview will take less than one hour to complete. Your participation in this study is entirely voluntary, and all responses will be anonymous. If you agree to participate, you can choose to stop at any time or to skip any questions you do not want to answer. Your answers will be completely confidential; we will not share information that identifies you with anyone. Only the household identification number will be placed on the questionnaire, but your name will not be attached to the survey or the report.

If you have any questions about confidentiality or voluntariness of the survey you may contact Dr. Robert Richardson at Department of Community Sustainability, Michigan State University, USA, telephone: +1 (517)-355-9533, email: [rbr@msu.edu](mailto:rbr@msu.edu); or Mr. Chouk Borin, Royal University of Agriculture, Phnom Penh, Cambodia, telephone: +855 12 898 095, email: [cborin@rua.edu.kh](mailto:cborin@rua.edu.kh).

Your participation and input is very important for our study objectives.

-----

**Do you agree to participate in the survey?**  **YES** (If YES, proceed with the survey)  **NO**

## MODULE A. HOUSEHOLD IDENTIFICATION

### A1. HOUSEHOLD IDENTIFICATION

| Code | Item                    | Province                         | District        | Commune         | Village | Household |
|------|-------------------------|----------------------------------|-----------------|-----------------|---------|-----------|
|      |                         | A101                             | A102            | A103            | A104    | A105      |
|      | Name (Location)         |                                  |                 |                 |         |           |
|      | Code (location)         |                                  |                 |                 |         |           |
| A106 | GPS coordinates         | (N):                             |                 | (E):            |         |           |
| A107 | Code of enumerator      |                                  |                 |                 |         |           |
| A108 | Date of visit           | _____ dd / _____ mm / _____ yyyy |                 |                 |         |           |
| A109 | Time: Start/End (hours) |                                  |                 |                 |         |           |
| A110 | Wealth group:           | 1. Non-poor _____                | 2. Poor 1 _____ | 3. Poor 2 _____ |         |           |
| A111 | Name of respondent:     |                                  |                 |                 |         |           |

## MODULE B. FISH PRODUCTION, SALES, INPUT USE IN THE LAST COMPLETED PRODUCTION CYCLE

### B1. FISH FARMING

|      |                                                                                            |                                                                            |  |
|------|--------------------------------------------------------------------------------------------|----------------------------------------------------------------------------|--|
| B101 | Has this household ever raised fish? (current or past)                                     | 1=YES (continue below)<br>2=NO (skip to B104)                              |  |
| B102 | Prior to HARVEST, did this household have an existing barrow pit?                          | 1=YES<br>2=NO                                                              |  |
| B103 | Prior to HARVEST, did this household have an existing fish pond?                           | 1=YES<br>2=NO                                                              |  |
| B104 | Does this household also participate in HARVEST horticulture (vegetable growing) programs? | 1=YES<br>2=NO                                                              |  |
| B105 | Does this household also participate in HARVEST rice production programs?                  | 1=YES<br>2=NO                                                              |  |
| B106 | Have you sold fish for income?                                                             | 1= YES (continue below)<br>2= NO (skip to B108)                            |  |
| B107 | Approximately how much of your total household income is from selling farmed fish?         | 1=Almost all<br>2=Most of it<br>3=Some of it<br>4=A small amount<br>5=None |  |
| B108 | Have you sold vegetables for income?                                                       | 1= YES (continue below)<br>2= NO (skip to B110)                            |  |
| B109 | Approximately how much of your total household income is from selling vegetables?          | 1=Almost all<br>2=Most of it<br>3=Some of it<br>4=A small amount<br>5=None |  |
| B110 | Have you sold rice for income?                                                             | 1= YES (continue below)<br>2= NO ( skip to B112)                           |  |
| B111 | Approximately how much of your total household income is from selling rice?                | 1=Almost all<br>2=Most of it                                               |  |

|      |                                                                                      |                                                                            |  |
|------|--------------------------------------------------------------------------------------|----------------------------------------------------------------------------|--|
|      |                                                                                      | 3=Some of it<br>4=A small amount<br>5=None                                 |  |
| B112 | Does this household <u>currently</u> raise fish?                                     | 1= YES (continue below)<br>2= NO ( >> Module D)                            |  |
| B113 | Approximately how long have you raised fish?                                         | Years                                                                      |  |
| B114 | How many fish production cycles have you <u>completed</u> with the HARVEST program?  | Number (0-4)                                                               |  |
| B115 | In the past 12 months, approximately how much total fish did this household produce? | Kilograms (kg)                                                             |  |
| B116 | Approximately how much of your harvest did this household consume as food?           | 1=Almost all<br>2=Most of it<br>3=Some of it<br>4=A small amount<br>5=None |  |

## B2. FISH PRODUCTION AND SALES

**ENUMERATOR:** In the table below, list all the species of fish the household report having raised during the last production cycle. Then, for each species, ask the questions regarding production and sales.

| Fish Species and Codes                                                                                                                                                                                             |      | Aquaculture Facility                                                                                                                             |                        | Feed                                                                                                   | How much did you produce? | Did you sell any [FISH SPECIES] from the last production cycle?<br><br>1=YES<br>2=NO (skip to next species) | Sales of FISH |                                                 |  |
|--------------------------------------------------------------------------------------------------------------------------------------------------------------------------------------------------------------------|------|--------------------------------------------------------------------------------------------------------------------------------------------------|------------------------|--------------------------------------------------------------------------------------------------------|---------------------------|-------------------------------------------------------------------------------------------------------------|---------------|-------------------------------------------------|--|
|                                                                                                                                                                                                                    | code | code                                                                                                                                             | Size (m <sup>2</sup> ) | Feed type code                                                                                         | Quantity (kg)             |                                                                                                             | Quantity (kg) | How much did you receive in sales? (000s Riels) |  |
| FISH SPECIES                                                                                                                                                                                                       | B201 | B202                                                                                                                                             | B203                   | B204                                                                                                   | B205                      | B206                                                                                                        | B207          | B208                                            |  |
|                                                                                                                                                                                                                    |      |                                                                                                                                                  |                        |                                                                                                        |                           |                                                                                                             |               |                                                 |  |
|                                                                                                                                                                                                                    |      |                                                                                                                                                  |                        |                                                                                                        |                           |                                                                                                             |               |                                                 |  |
|                                                                                                                                                                                                                    |      |                                                                                                                                                  |                        |                                                                                                        |                           |                                                                                                             |               |                                                 |  |
|                                                                                                                                                                                                                    |      |                                                                                                                                                  |                        |                                                                                                        |                           |                                                                                                             |               |                                                 |  |
|                                                                                                                                                                                                                    |      |                                                                                                                                                  |                        |                                                                                                        |                           |                                                                                                             |               |                                                 |  |
|                                                                                                                                                                                                                    |      |                                                                                                                                                  |                        |                                                                                                        |                           |                                                                                                             |               |                                                 |  |
|                                                                                                                                                                                                                    |      |                                                                                                                                                  |                        |                                                                                                        |                           |                                                                                                             |               |                                                 |  |
| Fish species codes (B201):<br>1= Climbing Perch<br>2= Walking Catfish<br>3= Nile Tilapia<br>4= Pangasius Catfish<br>5=Silver Barb<br>6=Indian Carp<br>7= Common Carp<br>8= Silver Carp<br>9=Other (please specify) |      | Facility codes (B202):<br>1=Fish pond<br>2=Rice/fish intercrop<br>3=Community fishery<br>4=Steel cage<br>5=Wood cage<br>6=Other (please specify) |                        | Feed type codes (B204):<br>1=Purchased feed<br>2=Feed provided<br>3=Homemade feed<br>4=Trash fish only |                           |                                                                                                             |               |                                                 |  |

### B3. USE OF INPUTS IN FISH PRODUCTION

**ENUMERATOR:** If the household produced any type of fish (B2), complete the table below. It refers to the use of inputs with respect to fish production during the last production cycle. The spending figures should be related to inputs used in the aggregate for all species of fish.

| Input Type and Code                                                                                                                |      | Did you use [INPUT TYPE] in fish production during the last production cycle?<br><br>1=YES<br>2=NO (>> next type)                                                                                                                                                 | What was the source?<br><br>(Source code list) | If purchased, how much did you pay in the total?<br><br>(Riels) |
|------------------------------------------------------------------------------------------------------------------------------------|------|-------------------------------------------------------------------------------------------------------------------------------------------------------------------------------------------------------------------------------------------------------------------|------------------------------------------------|-----------------------------------------------------------------|
|                                                                                                                                    | code |                                                                                                                                                                                                                                                                   |                                                |                                                                 |
| INPUT TYPE                                                                                                                         |      | A                                                                                                                                                                                                                                                                 | B                                              | C                                                               |
| Setup cost (pond, facility, equipment, etc.)                                                                                       | B301 |                                                                                                                                                                                                                                                                   |                                                |                                                                 |
| Fingerlings                                                                                                                        | B302 |                                                                                                                                                                                                                                                                   |                                                |                                                                 |
| Commercial fish feed                                                                                                               | B303 |                                                                                                                                                                                                                                                                   |                                                |                                                                 |
| Fertilizer or compost                                                                                                              | B304 |                                                                                                                                                                                                                                                                   |                                                |                                                                 |
| Lime                                                                                                                               | B305 |                                                                                                                                                                                                                                                                   |                                                |                                                                 |
| Net                                                                                                                                | B306 |                                                                                                                                                                                                                                                                   |                                                |                                                                 |
| Fencing                                                                                                                            | B307 |                                                                                                                                                                                                                                                                   |                                                |                                                                 |
| Stocking hapa                                                                                                                      | B308 |                                                                                                                                                                                                                                                                   |                                                |                                                                 |
| Transportation cost                                                                                                                | B309 |                                                                                                                                                                                                                                                                   |                                                |                                                                 |
| Technical services                                                                                                                 | B310 |                                                                                                                                                                                                                                                                   |                                                |                                                                 |
| Operations and maintenance                                                                                                         | B311 |                                                                                                                                                                                                                                                                   |                                                |                                                                 |
| Other facilities or equipment                                                                                                      | B312 |                                                                                                                                                                                                                                                                   |                                                |                                                                 |
| Hired labor                                                                                                                        | B313 |                                                                                                                                                                                                                                                                   |                                                |                                                                 |
| Other (specify)                                                                                                                    | B314 |                                                                                                                                                                                                                                                                   |                                                |                                                                 |
| Source codes:<br>1=Own (self-produced)<br>2=Provided free by HARVEST program<br>3=Purchased from dealer<br>4=Purchased from farmer |      | 5=Provided free by another program (NGO or government)<br>6=Provided free by friend, neighbour, or family<br>7= Combination of own and purchased<br>8=Combination of own and provided free<br>9=Combination of purchased and provided free<br>10=others (specify) |                                                |                                                                 |

**How likely are you to use these fish farming technologies in the future?**

| Code | Fish technologies         | Very likely | Somewhat likely | Neutral | Unlikely | Very unlikely |
|------|---------------------------|-------------|-----------------|---------|----------|---------------|
| B315 | Aquaculture in fish ponds |             |                 |         |          |               |
| B316 | Purchased fingerlings     |             |                 |         |          |               |
| B317 | Commercial fish feed      |             |                 |         |          |               |
| B318 | Purchased fertilizer      |             |                 |         |          |               |
| B319 | Purchased lime            |             |                 |         |          |               |
| B320 | Purchased fencing         |             |                 |         |          |               |
| B321 | Stocking hapa             |             |                 |         |          |               |

#### B4. PERCEPTIONS OF FISH FARMING

|                                                                                                                                                                                                                |                             |  |
|----------------------------------------------------------------------------------------------------------------------------------------------------------------------------------------------------------------|-----------------------------|--|
| <b>B401.</b> <i>think about the way you raise your fish, do you feel you can improve your fish yield by adopting the new technologies (provided to you by Harvest) and modify your way of normal practice?</i> | 1= YES<br>2= NO<br>3=unsure |  |
| <b>B402.</b> <i>Do you believe that there are barriers to fully adopt these aquaculture technologies brought to you by Harvest?</i><br>If NO, please skip to question B520.                                    | 1= YES<br>2= NO<br>3=unsure |  |

If YES, let me read some barriers, please indicate how important you feel these barriers are (from 1=Not at all important to 5=Very important):

|             | <b>Barriers to adoption of new/improved farming practices or technologies</b> | 1= Not at all important<br>2= A little important<br>3= Neutral<br>4= Somewhat important<br>5= Very important |
|-------------|-------------------------------------------------------------------------------|--------------------------------------------------------------------------------------------------------------|
| <b>B403</b> | Access to fingerlings                                                         |                                                                                                              |
| <b>B404</b> | Price of fingerlings                                                          |                                                                                                              |
| <b>B405</b> | Quality of fingerlings                                                        |                                                                                                              |
| <b>B406</b> | Access to fish feed                                                           |                                                                                                              |
| <b>B407</b> | Price of fish feed                                                            |                                                                                                              |
| <b>B408</b> | Quality of fish feed                                                          |                                                                                                              |
| <b>B409</b> | Selling price of fish in markets                                              |                                                                                                              |
| <b>B410</b> | Access to fish markets                                                        |                                                                                                              |
| <b>B411</b> | Access to sufficient supplies of water                                        |                                                                                                              |
| <b>B412</b> | I do not know the new technology                                              |                                                                                                              |
| <b>B413</b> | I do not understand the new technology                                        |                                                                                                              |
| <b>B414</b> | Adoption of the new technology does not make any differences                  |                                                                                                              |
| <b>B415</b> | The fish farming technology is not suitable to my operation.                  |                                                                                                              |
| <b>B416</b> | I cannot get credit needed to adopt the new technology.                       |                                                                                                              |
| <b>B417</b> | I do not own the land where I raise fish.                                     |                                                                                                              |
| <b>B418</b> | My fish farming operation is too small.                                       |                                                                                                              |
| <b>B419</b> | Other reasons (please specify...)                                             |                                                                                                              |

In response to the following statements, please respond by saying if you agree, disagree, or neither:

|             | <b>Statement</b>                                                      | <b>Code</b><br>1 = Agree<br>2 = Disagree<br>3 = Neither |
|-------------|-----------------------------------------------------------------------|---------------------------------------------------------|
| <b>B420</b> | I have a good feeling about aquaculture                               |                                                         |
| <b>B421</b> | Farmed fish are less delicious than wild caught fish                  |                                                         |
| <b>B422</b> | Fish feed is readily available in my province                         |                                                         |
| <b>B423</b> | Sometimes I cannot afford all of the food to feed my family or myself |                                                         |
| <b>B424</b> | Aquaculture is a highly risky practice                                |                                                         |
| <b>B425</b> | I would encourage my friends and family to participate in aquaculture |                                                         |
| <b>B426</b> | High quality fingerlings are readily available in my province         |                                                         |
| <b>B427</b> | Aquaculture helps to conserve natural resources in the Tonle Sap      |                                                         |
| <b>B428</b> | Aquaculture is an economically viable and profitable activity         |                                                         |

## MODULE C. ACCESS TO EXTENSION AND ADVISORY SERVICES

### C1. FISH PRODUCTION AND MARKETING

**ENUMERATOR:** In this section, please collect information on reception of extension and advisory services for fish production and marketing. *I will read a list of extension service providers, please tell me whether you have used services from any of these providers and how often you have used their services in the past 12 months.*

| Code                                                                                                                                                                                                                                                                                                                                | Extension Service Provider                                        | Have you received services from them?<br>1= YES*<br>2= NO | *If Yes, number of times contacted in past one year | What type of practice, information, or access did you learn about with this service? (codes) | Did you pay for the service?<br>1=YES<br>2=NO | After receiving the advice, did you follow it?<br>1=YES<br>2=NO |
|-------------------------------------------------------------------------------------------------------------------------------------------------------------------------------------------------------------------------------------------------------------------------------------------------------------------------------------|-------------------------------------------------------------------|-----------------------------------------------------------|-----------------------------------------------------|----------------------------------------------------------------------------------------------|-----------------------------------------------|-----------------------------------------------------------------|
|                                                                                                                                                                                                                                                                                                                                     |                                                                   | A                                                         | B                                                   | C                                                                                            | D                                             | E                                                               |
| C102                                                                                                                                                                                                                                                                                                                                | District agricultural service center, extension agent             |                                                           |                                                     |                                                                                              |                                               |                                                                 |
| C103                                                                                                                                                                                                                                                                                                                                | Local village/commune office                                      |                                                           |                                                     |                                                                                              |                                               |                                                                 |
| C104                                                                                                                                                                                                                                                                                                                                | Fertilizer or Input supply dealer                                 |                                                           |                                                     |                                                                                              |                                               |                                                                 |
| C105                                                                                                                                                                                                                                                                                                                                | HARVEST program                                                   |                                                           |                                                     |                                                                                              |                                               |                                                                 |
| C106                                                                                                                                                                                                                                                                                                                                | Other program or project (besides HARVEST program)                |                                                           |                                                     |                                                                                              |                                               |                                                                 |
| C107                                                                                                                                                                                                                                                                                                                                | University or college of agriculture                              |                                                           |                                                     |                                                                                              |                                               |                                                                 |
| C108                                                                                                                                                                                                                                                                                                                                | Technical or vocational schools                                   |                                                           |                                                     |                                                                                              |                                               |                                                                 |
| C109                                                                                                                                                                                                                                                                                                                                | Cambodian Agricultural Research and Development Institute (CARDI) |                                                           |                                                     |                                                                                              |                                               |                                                                 |
| C110                                                                                                                                                                                                                                                                                                                                | Agricultural research station                                     |                                                           |                                                     |                                                                                              |                                               |                                                                 |
| C111                                                                                                                                                                                                                                                                                                                                | Fish trader                                                       |                                                           |                                                     |                                                                                              |                                               |                                                                 |
| C112                                                                                                                                                                                                                                                                                                                                | Neighbors or friends                                              |                                                           |                                                     |                                                                                              |                                               |                                                                 |
| C113                                                                                                                                                                                                                                                                                                                                | Other (Please specify)                                            |                                                           |                                                     |                                                                                              |                                               |                                                                 |
| Extension type codes:<br>1=Fish farming techniques<br>2=Input usage<br>3=Pond construction<br>4=Pond management<br>5=Drying at post-harvest<br>6=Storage facilities<br>7=Advice on output prices<br>8=Advice on input prices<br>9=Information on where to sell<br>10=Credit, micro-finance, or savings<br>11=Other (please specify) |                                                                   |                                                           |                                                     |                                                                                              |                                               |                                                                 |

### C2. SOURCES OF INFORMATION

*What is your main source of information about fish farming, I will read the list of possible information source and please indicate how much you use the source for information.*

|      | Type of information      | 1= Nothing at all<br>2= A little<br>3= Some<br>4= A fair amount<br>5= A great deal |
|------|--------------------------|------------------------------------------------------------------------------------|
| C201 | HARVEST technicians      |                                                                                    |
| C202 | Newspapers and magazines |                                                                                    |

|             |                                                       |  |
|-------------|-------------------------------------------------------|--|
| <b>C203</b> | Extension publications                                |  |
| <b>C204</b> | Television programs                                   |  |
| <b>C205</b> | Radio programs                                        |  |
| <b>C207</b> | Web/Internet/E-mail                                   |  |
| <b>C208</b> | Extension meetings, workshops, courses                |  |
| <b>C209</b> | Aquaculture researchers                               |  |
| <b>C210</b> | Demonstrations fish farming operations and field days |  |
| <b>C211</b> | Personal contact with extension agents                |  |
| <b>C212</b> | Leader farmers in your area                           |  |
| <b>C213</b> | Neighbors/relatives                                   |  |
| <b>C214</b> | Other sources (Please specify)                        |  |



## MODULE D. DISADOPTION

**ENUMERATOR:** This section is only for those households that no longer raise fish (answered **NO** to Question **B112**). For all other households, please skip this module.

### D1. Fish production cycles completed

|      |                                                                                   |               |  |
|------|-----------------------------------------------------------------------------------|---------------|--|
| D101 | How many fish production cycles did you <u>complete</u> with the HARVEST program? | Number (0-4)  |  |
| D102 | Did you stop practicing fish farming?                                             | 1=YES<br>2=NO |  |

*How important were the following factors to your decision to stop fish farming?*

|      | Factors related to decision to stop practicing fish farming  | 1= Not at all important<br>2= A little important<br>3= Neutral<br>4= Somewhat important<br>5= Very important |
|------|--------------------------------------------------------------|--------------------------------------------------------------------------------------------------------------|
| D103 | Access to fingerlings                                        |                                                                                                              |
| D104 | Price of fingerlings                                         |                                                                                                              |
| D105 | Quality of fingerlings                                       |                                                                                                              |
| D106 | Access to fish feed                                          |                                                                                                              |
| D107 | Price of fish feed                                           |                                                                                                              |
| D108 | Quality of fish feed                                         |                                                                                                              |
| D109 | Selling price of fish in markets                             |                                                                                                              |
| D110 | Access to fish markets                                       |                                                                                                              |
| D111 | Access to sufficient supplies of water                       |                                                                                                              |
| D112 | I do not know the new technology                             |                                                                                                              |
| D113 | I do not understand the new technology                       |                                                                                                              |
| D114 | Fish farming is not profitable.                              |                                                                                                              |
| D115 | The fish farming technology is not suitable to my operation. |                                                                                                              |
| D116 | I cannot get credit needed to continue fish farming.         |                                                                                                              |
| D117 | I do not own the land where I raise fish.                    |                                                                                                              |
| D118 | My fish farming operation is too small.                      |                                                                                                              |
| D119 | Other reasons (please specify...)                            |                                                                                                              |

In response to the following statements, please respond by saying if you agree, disagree, or neither:

|      | Statement                                                             | Code<br>1 = Agree<br>2 = Disagree<br>3 = Neither |
|------|-----------------------------------------------------------------------|--------------------------------------------------|
| D120 | I have a positive view of aquaculture                                 |                                                  |
| D121 | Farmed fish are of lower quality than wild caught fish                |                                                  |
| D122 | Fish feed is readily available in my province                         |                                                  |
| D123 | Sometimes I cannot afford all of the food to feed my family or myself |                                                  |
| D124 | Aquaculture is a highly risky practice                                |                                                  |
| D125 | I would encourage my friends and family to participate in aquaculture |                                                  |
| D126 | High quality fingerlings are readily available in my province         |                                                  |
| D127 | Aquaculture is environmentally beneficial for the Tonle Sap           |                                                  |
| D128 | Aquaculture is an economically viable and profitable activity         |                                                  |

**MODULE E. DEMOGRAPHICS**

|                                                                  |                                                                                                                                                                                                                                                                                            |  |
|------------------------------------------------------------------|--------------------------------------------------------------------------------------------------------------------------------------------------------------------------------------------------------------------------------------------------------------------------------------------|--|
| <b>E101.</b> Are you the head of this household?                 | 1=YES (skip to E103)<br>2=NO (continue below)                                                                                                                                                                                                                                              |  |
| <b>E102.</b> What is your relationship to the head of household? | 1 = Spouse/partner<br>2 = Son/daughter<br>3 = Son-in-law/daughter-in-law<br>4 = Grandson/granddaughter<br>5 = Mother/father (or Mother/father-in-law)<br>6 = Brother/sister (or Brother-/sister-in-law)<br>7 = Nephew/niece<br>8 = Cousin<br>9 = Other relative<br>10 = Other relationship |  |

|                   | <b>E103</b>           | <b>E104</b>               | <b>E105</b>                                                                                    | <b>E106</b>                  | <b>E107</b>                                          |
|-------------------|-----------------------|---------------------------|------------------------------------------------------------------------------------------------|------------------------------|------------------------------------------------------|
| Household Member  | Sex<br>1 = M<br>2 = F | What is the age in years? | What is the marital status?<br>1 = married<br>2 = divorced<br>3 = widowed<br>4 = never married | Number of years of schooling | Can this person read and write?<br>1 = YES<br>2 = NO |
| Head of Household |                       |                           |                                                                                                |                              |                                                      |
| Respondent        |                       |                           |                                                                                                |                              |                                                      |

|                                                                             |  |
|-----------------------------------------------------------------------------|--|
| <b>E108.</b> How many children aged 14 years or less are in this household? |  |
| <b>E109.</b> How many people aged 15-69 years are in this household?        |  |
| <b>E110.</b> How many people aged 70 years or above are in this household?  |  |

|                                                                                      |                           |               |
|--------------------------------------------------------------------------------------|---------------------------|---------------|
| <b>E111.</b> Does this household own a:<br><br>(If yes, ask how many, if no write 0) | <b>Asset</b>              | <b>Number</b> |
|                                                                                      | a. Mobile phone           |               |
|                                                                                      | b. Radio                  |               |
|                                                                                      | c. Television             |               |
|                                                                                      | d. Bicycle                |               |
|                                                                                      | e. Motorbike              |               |
|                                                                                      | f. Car or truck           |               |
|                                                                                      | g. Solar panel            |               |
|                                                                                      | h. Improved cooking stove |               |
|                                                                                      | i. Refrigerator           |               |
| j. Sofa                                                                              |                           |               |

## E2. LIVESTOCK

*Do you raise any of the following livestock?*

|      | Livestock                    | 1=YES*<br>2=NO | *If YES, how<br>many do you<br>raise? (number) |
|------|------------------------------|----------------|------------------------------------------------|
|      |                              | A              | B                                              |
| E201 | Cattle                       |                |                                                |
| E202 | Buffalo                      |                |                                                |
| E203 | Pigs                         |                |                                                |
| E204 | Chicken                      |                |                                                |
| E205 | Ducks                        |                |                                                |
| E206 | Goats                        |                |                                                |
| E207 | Others (Please specify.....) |                |                                                |

## E3. SOURCES OF HOUSEHOLD INCOME

| <i>Sources of income:<br/>(Circle one under both E301. and E302. columns)</i> | <i>E301. What is the<br/>most important source<br/>of income for this<br/>household?</i> | <i>E302. What is the<br/>second most important<br/>source of income for<br/>this household?</i> |
|-------------------------------------------------------------------------------|------------------------------------------------------------------------------------------|-------------------------------------------------------------------------------------------------|
| <i>Sales of fish</i>                                                          | 1                                                                                        | 1                                                                                               |
| <i>Sales of rice from your own fields</i>                                     | 2                                                                                        | 2                                                                                               |
| <i>Sales from vegetable gardens</i>                                           | 3                                                                                        | 3                                                                                               |
| <i>Wage labor</i>                                                             | 4                                                                                        | 4                                                                                               |
| <i>Small business/self-employment</i>                                         | 5                                                                                        | 5                                                                                               |
| <i>Remittances</i>                                                            | 6                                                                                        | 6                                                                                               |
| <i>Retirement funds</i>                                                       | 7                                                                                        | 7                                                                                               |
| <i>Other (specify):</i>                                                       | 99                                                                                       | 99                                                                                              |

**Thank you for taking the time to complete this survey.**
